# Supplementary material for: A Standardized Brain Molecular Atlas: A Resource for Systems Modeling and Simulation
Source: Front Mol Neurosci. 2021 Nov 10;14:604559. doi: 10.3389/fnmol.2021.604559 (PMC8631404; doi:10.3389/fnmol.2021.604559)
Supplement: Supplementary file 9 [file Table_1.xlsx]

## Sheet: ProteinResources
#	Reference	Methods	Organism	Locations	Data
1	Bai et al., 2020. Deep Multilayer Brain Proteomics Identifies Molecular Networks in Alzheimer’s Disease Progression	TMT, LC/LC-MS/MS	Mouse (3, 6, and 12 months. Both sexes), Human	Cortex	TMT, proteins of ~10,000 genes
2	Kjell et al., 2020. Defining the Adult Neural Stem Cell Niche Proteome Identifies Key Regulators of Adult Neurogenesis	Library-Matched Single Shot (LMSS) Method, Quantitative Detergent Solubility Profile (QDSP) Method. nanoflow UHPLC. MS/MS	Mouse (male C57BL/6J mice between 8-10 weeks)	Cortex, olfactory bulb, medial subependymal zone, subependymal zone	LFQ, proteins of ~7,000 genes
3	Davis et al., 2019. Development of a Sensitive, Scalable Method for Spatial, Cell-Type-Resolved Proteomics of the Human Brain	laser capture microdissection (LCM). nano-UPLC−MS/MS using a Dionex Ultimate 3000 coupled online to an Orbitrap Fusion Lumos	Human	Neurons	iBAQ, proteins of >4,000 genes
4	Fecher et al., 2019. Cell-type-specific profiling of brain mitochondria reveals functional and molecular diversity	Easy nLC-1000 nano UHPLC coupled online via a Nanospray Flex electrospray ion source equipped with a column oven to either a Q-Exactive or a Q-Exactive HF mass spectrometer	Mouse (8- to 9-week-old male mice)	Brain cell-type specific mitochondria	LFQ, proteins of ~6,000 genes
5	Guergues et al., 2019. Improved Methodology for Sensitive and Rapid Quantitative Proteomic Analysis of Adult-Derived Mouse Microglia: Application to a Novel In Vitro Mouse Microglial Cell Model	UPLC. MS and MS/MS	Mouse (adult)	Microglia	LFQ, proteins of ~5,000 genes
6	Hamezah et al., 2019. Modulation of Proteome Profile in A PP/PS1 Mice Hippocampus, Medial Prefrontal Cortex, and Striatum by Palm Oil Derived Tocotrienol-Rich Fraction	UHPLC coupled to Q Exactive HF Orbitrap mass spectrometry. LC-MS/MS	Mouse	Cortex, hippocampus, striatum	LFQ, proteins of ~3,000 genes
7	Hasan et al., 2019. Quantitative proteome analysis of brain sub‐regions and spinal cord from experimental autoimmune encephalomyelitis mice by TMT‐based mass spectrometry	TMT, Ultimate 3000 RSLC, MS/MS	Mouse (male C57BL/6J mice)	Cortex, brainstem, cerebellum, hippocampus, spinal cord, striatum	TMT, proteins of ~10,000 genes
8	McKetney et al., 2019. Proteomic Atlas of the Human Brain in Alzheimer’s Disease	UHPLC-MS/MS	Human	Cortex, cerebellum, amygdala, thalamus, striatum	LFQ, proteins of >8,500 genes
9	Chuang et al., 2018. Unbiased Proteomic Study of the Axons of Cultured Rat Cortical Neurons.	2D-LC−MS/MS analyses without and with stable isotope dimethyl labeling	Rat (cortices of Sprague−Dawley rat fetuses at embryonic day 18)	Neurons, axons	iBAQ. >2,500 axonal proteins and 103 axon-enriched proteins.
10	Duda et al., 2018. Global quantitative TPA-based proteomics of mouse brain structures reveals significant alterations in expression of proteins involved in neuronal plasticity during aging.	Quantitative TPA‐based proteomics	Mouse (male C57BL/10J mice: young (P30) and aged (12 months))	Cerebellum, cortex, hippocampus	Concentrations . >5,200 proteins in hippocampus, cortex, cerebellum.
11	Fornasiero et al., 2018. Precisely measured protein lifetimes in the mouse brain reveal differences across tissues and subcellular fractions	SILAC-labelling, LC-MS/MS (UltiMate 3000 RSLCnano HPLC system (ThermoFisher Scientific) coupled online to the Q-Exactive-HF)	Mouse	Cortex	iBAQ, proteins of >1,500 genes
12	Hamezah et al., 2018. Proteome profiling in the hippocampus, medial prefrontal cortex, and striatum of aging rat.	Ultrahigh performance liquid chromatography with Q Exactive HF Orbitrap mass spectrometry (UHPLC-MS)	Rat (Male Sprague-Dawley rats: 14, 18, 23, and 27 months old)	Cortex, hippocampus, striatum	LFQ. 1,074 proteins in the hippocampus, 871 proteins in the mPFC, and 241 proteins in the striatum.
13	Krogager et al., 2018. Labeling and identifying cell- type-specific proteomes in the mouse brain.	SORT tagging, LC-MS/MS	Mouse (adult male or female C57/BL6J, Vgat-Cre and Vglut-Cre mice: 10 weeks)	Striatum neurons	Intensity, log2(LFQ). >2,000 proteins.
14	Zhu et al., 2018. Spatially Resolved Proteome Mapping of Laser Capture Microdissected Tissue with Automated Sample Transfer to Nanodroplets	Laser Capture Microdissection, nanoLC-MS/MS	Rat (post-natal day 17)	Corpus callosum, cortex, striatum	LFQ, proteins of ~1,000 genes
15	Carlyle et al., 2017. A multiregional proteomic survey of the postnatal human brain	LC-MS/MS. Q Exactive Plus mass spectrometer (ThermoFisher Scientific) coupled online to a Waters nanoAcquity UPLC	Human	Cortex, cerebellum, hippocampus, amygdala, thalamus, striatum	LFQ, proteins of ~5,000 genes
16	Hosp et al., 2017. Spatiotemporal Proteomic Profiling of Huntington’s Disease Inclusions Reveals Widespread Loss of Protein Function	UHPLC-MS/MS	Mouse (female R6/2 mice (B6CBA-Tg(HDexon1) 62 gpb/1J) carrying a 150 ± 5 CAG repeat expansion and non-transgenic littermate controls: 5,8,12 weeks)	Cortex, hippocampus, cerebellum, striatum, csf	LFQ, iBAQ. ~8,500 proteins (soluble proteome); >1,300 proteins (insoluble proteome)
17	Itzhak et al., 2017. Mass Spectrometry-Based Approach for Mapping Protein Subcellular Localization Reveals the Spatial Proteome of Mouse Primary Neurons.	SILAC, LFQ, TMT MS	Mouse (C57BL/6 background: E15)	Subcellular: large protein complex, endosome, plasma membrane, lysosome, nucleus, ER, mitochondria, peroxisome, Golgi apparatus, actin binding proteins, subcellular not specific	LFQ, abundance, molar concentrations; subcellular fraction. > 8,000 proteins.
18	Jean Beltran et al, 2016. A Portrait of the Human Organelle Proteome In Space and Time during Cytomegalovirus Infection	Immunofluorescence microscopy, label-free MS	Human	Subcellular: plasma membrane, lysosome, ER, mitochondria, cytoplasm, peroxisome, Golgi apparatus, subcellular not specific	iBAQ. Subcellular localizations of nearly 4,000 host (human) proteins.
19	Sharma et al., 2015. Cell type- and brain region-resolved mouse brain proteome.	LC-MS/MS	Mouse (male C57BL/6: P60)	Cultured: neurons, astrocytes, oligodendrocytes, microglia Isolated: cortex, hippocampus, thalamus, striatum, cerebellum, olfactory bulb, optic nerve, corpus callosum, brainstem, neurons, astrocytes, oligodendrocytes, microglia, brain	LFQ. >12,000 proteins.
20	Wisńiewski et al., 2015. Integrating Proteomics and Enzyme Kinetics Reveals Tissue-Specific Types of the Glycolytic and Gluconeogenic Pathways	LC-MS/MS	Mouse (adult Swiss white mice)	Brain	Concentrations (mol/g protein) . ~10,000 genes
21	Han et al., 2014. Proteomic analysis of mouse astrocytes and their secretome by a combination of FASP and StageTip-based, high pH, reversed-phase fractionation.	LC-MS/MS	Mouse (C8-D1A type-1 murine astrocyte cell line derived from C57BL/6)	Astrocytes	LFQ. 7,265 unique protein groups.
22	Geiger et al., 2013. Initial Quantitative Proteomic Map of 28 Mouse Tissues Using the SILAC Mouse.	SILAC-labelling, LC-MS/MS	Mouse (C57BL/6, adult and embryonic)	Cortex, medulla, cerebellum, olfactory bulb, midbrain	SILAC intensity L, ratio H/L. 4,906 proteins

## Sheet: MetaboliteResources
#	Reference	Methods	Organism	Locations	Data
1	(2012). Neural Metabolism In Vivo (Boston, MA: Springer US). 10.1007/978-1-4614-1788-0	review	rat, human	extracellular, mitochondria, cytosol, astrocyte, brain, blood	molar
2	Berndt 2015	model	model	mitochondria, neuron	molar
3	Calvetti 2018	model	model	astrocyte	molar
4	Chen, 2016, Anal Bioanal Chem, Target-based metabolomics for the quantitative measurement of 37 pathway metabolites in rat brain and serum using hydrophilic interaction ultra-high-performance liquid chromatography–tandem mass spectrometry	mass spectrometry	rat	brain	ng/g wet tissue
5	Chen, 2016, Cell, Absolute Quantification of Matrix Metabolites Reveals the Dynamics of Mitochondrial Metabolism	mass spectrometry	human	mitochondrial matrix of HeLa cells, HeLa cells (Whole-cell)	molar
6	Cruz, 2005, Journal of Neurochemistry, Activation of astrocytes in brain of conscious rats during acoustic stimulation: acetate utilization in working brain	quantitative autoradiography	rat	Cerebral cortex left, Cerebral cortex right, arterial plasma, Inferior colliculus right (activated) rat, Inferior colliculus left rat	umol/g, uM
7	Cudalbu, 2005, Proceedings of the 2005 IEEE Engineering in Medicine and Biology 27th Annual Conference, Metabolite concentrations of healthy mouse brain by Magnetic Resonance Spectroscopy at 7 Tesla	MRS	mouse	brain	umol/g
8	De Feyter, H.M., Behar, K.L., Corbin, Z.A., Fulbright, R.K., Brown, P.B., McIntyre, S., Nixon, T.W., Rothman, D.L., and de Graaf, R.A. (2018). Deuterium metabolic imaging (DMI) for MRI-based 3D mapping of metabolism in vivo. Science Advances	review	review	brain	molar
9	Duarte, Gruetter, Glutamatergic and GABAergic energy metabolism measured in the rat brain by 13C NMR spectroscopy at 14.1 T, 2013. doi: 10.1111/jnc.12333	MRS	rat	brain	umol/g
10	Flanagan, B., McDaid, L., Wade, J., Wong-Lin, K., and Harkin, J. (2018). A computational study of astrocytic glutamate influence on post-synaptic neuronal excitability. PLOS Computational Biology	review,model	review,model	astrocyte	molar
11	Gibson & Blass 1976	estimation	estimation	neuron mitochondria	molar
12	HMDB 4.0	database	human	CSF, Cellular Cytoplasm, Blood	molar
13	Hertz 2017 10.3389/fnint.2017.00018 Integration between Glycolysis and Glutamate-Glutamine Cycle Flux May Explain Preferential Glycolytic Increase during Brain Activation, Requiring Glutamate	review	review	blood, brain	molar
14	Hertz, L., and Rothman, D. (2017). Glutamine-Glutamate Cycle Flux Is Similar in Cultured Astrocytes and Brain and Both Glutamate Production and Oxidation Are Mainly Catalyzed by Aspartate Aminotransferase. Biology	review	review	cultured astrocytes	molar
15	Jolivet, R., Coggan, J.S., Allaman, I., and Magistretti, P.J. (2015). Multi-timescale Modeling of Activity-Dependent Metabolic Coupling in the Neuron-Glia-Vasculature Ensemble. PLOS Computational Biology	review,model	review,model	neuron,astrocyte	molar
16	K. K. TSUBOI, K. FUKUNAGA, AND J. C. PETRICCIANI, Purification and Specific Kinetic Properties of Erythrocyte\n Uridine\nDiphosphate Glucose Pyrophosphorylase, The Journal of Biological Chemistry, Vol. 244, No. 4, Issue of February 25, pp. 1008-1015,1969	chemistry	human	erythrocyte	molar
17	Kauffman 1969	estimation	estimation	brain	molar
18	Kinetic models of glycogen metabolism in normal rat liver, morris Hepatoma 7787 and host liver. P.John Anderson, Barbara E.Wright, 1980, Int J. Biochem.. Vol. I2. pp. 361 to 369, https://doi.org/10.1016/0020-711X(80)90115-9	model	rat	liver	molar
19	Kulak, 2010, Journal of Neurochemistry, Neurochemical profile of the developing mouse cortex determined by in vivo 1H NMR spectroscopy at 14.1 T and the effect of recurrent anaesthesia	MRS	mouse	posterior cortex, anterior cortex	umol/g
20	Lee, 2014, Cell Metabolism, Akt-Dependent Metabolic Reprogramming Regulates Tumor Cell Histone Acetylation	mass spectrometry	human	human glioblastoma ln229 cells	molar
21	Liu, 2018, Cell, Acetate Production from Glucose and Coupling to Mitochondrial Metabolism in Mammals	mass spectrometry	human	HCT116 cells	molar
22	Lust, 2003, Metabolic Brain Disease, Changing Metabolic and Energy Profiles in Fetal, Neonatal, and Adult Rat Brain	chemistry	rat	cortex rat P7 neonate, cortex rat adult, striatum rat P7 neonate, striatum rat adult'	nmol/mg dry weight
23	McBean, 2017, Antioxidants, Cysteine, Glutathione, and Thiol Redox Balance in Astrocytes	review	review	astrocyte (primary), extracellular	molar
24	Modeling of ATP–ADP steady‐state exchange rate mediated by the adenine nucleotide translocase in isolated mitochondria FEBS 2009 Eugeniy Metelkin Oleg Demin Zsuzsanna Kovács Christos Chinopoulos	model	rat	rat liver mitochondria	molar
25	Mogilevskaya 2006	model	model	mitochondria	molar
26	Nakayama 2005	model	model	erythrocyte	molar
27	Neves, 2012, Plos Computational Biology, Determinants of brain cell metabolic phenotypes and energy substrate utilization unraveled with a modeling approach	model	model	intracellular, brain	molar
28	Patel, 2004, Journal of Cerebral Blood Flow & Metabolism, Glutamatergic Neurotransmission and Neuronal Glucose Oxidation Are Coupled During Intense Neuronal Activation	MRS	rat	cortical extracts	umol/g
29	Pouwels, 1998, Magn. Reson. Med., Regional Metabolite Concentrations in Human Brain as Determined by Quantitative Localized Proton MRS	MRS	human	cerebellum vermis, white matter parietal, grey matter insular, cerebellum hemisphere, grey matter parietal, grey matter frontal, grey matter occipital, white matter occipital, white matter frontal, thalamus	molar
30	Regulation of glycogen synthase from mammalian skeletal muscle – a unifying view of allosteric and covalent regulation Daniel C. Palm 2013	review	review	brain	molar
31	Robinson, 2016, Neurochemistry International, Astroglial glutamate transporters coordinate excitatory signaling and brain energetics	review	review	extracellular, synaptic	molar
32	Ronowska, 2018, Frontiers in Cellular Neuroscience, Regulatory Effects of Acetyl-CoA Distribution in the Healthy and Diseased Brain	review	review, rat, mouse	cytosol neuron, mitochondria, mitochondria whole forebrain mice, C6 astroglioma cells, synaptosomal mitochondria mice, synaptosomal cytosol mice, mitochondria neuron,N9 microglial cells	molar
33	Schwarz, 2015, Cellular and Molecular Life Sciences, "The endoplasmic reticulum: structure, function and response to cellular signaling."	review	review	extracellular, cytosol, ER	molar
34	Shestov, A.A., Valette, J., Uğurbil, K., and Henry, P.-G. (2007). On the reliability of13C metabolic modeling with two-compartment neuronal-glial models. Journal of Neuroscience Research 85, 3294–3303	review	review	neuron, astrocyte	molar
35	Solling 1979 Studies on the Allosteric Properties of Glycogen Synthase I	chemistry	human	leukocyte	molar
36	Succinate, an intermediate in metabolism, signal transduction, ROS, hypoxia, and tumorigenesis Laszlo Trettera Attila Patocs Christos Chinopoulos	review	review	mitochondria	molar
37	Sugimoto, 2012, Nucleic Acids Research, MMMDB: Mouse Multiple Tissue Metabolome Database	mass spectrometry	mouse	cerebra, cerebella	umol/g
38	Tae-Hyun Kim, 2014, Journal of Analytical Methods in Chemistry, Quantification of Neurotransmitters in Mouse Brain Tissue by Using Liquid Chromatography Coupled Electrospray Tandem Mass Spectrometry	mass spectrometry	mouse	striatum, hippocampus, midbrain, brainstem, frontal cortex, cerebellum, hypothalamus, pituitary gland, olfactory bulb	ng/g wet tissue
39	Wiebenga, 2014, NMR in Biomedicine, Longitudinal absolute metabolite quantification of white and gray matter regions in healthy controls using proton MR spectroscopic imaging	MRS	human	white matter parietal baseline, gray matter frontal baseline, white matter frontal baseline, grey matter parietal baseline, white matter semioval baseline	molar
40	Zheng, 2012, Analytical chemistry, Quantitative Analysis of Neurochemical Panel in Rat Brain and Plasma by Liquid Chromatography−Tandem Mass Spectrometry	mass spectrometry	rat	brain	molar
41	Zheng, 2016, Scientific reports, The Brain Metabolome of Male Rats across the Lifespan	mass spectrometry	rat	brain	nmol/g brain tissue
